# Supplementary material for: Ptpn20 Deletion in H-tx Rats Facilitates Cotransporter-mediated Water Transport in the Choroid Plexus: Evidence of Genetic Risk for Hydrocephalus in an Experimental Study
Source: Research Square preprint supplement (doi:10.21203/rs.3.rs-1305224/v1), 2022-02-02
Supplement: Supplementary file 4 [file ae48bcf70743b3f02c3b4191.docx]

| 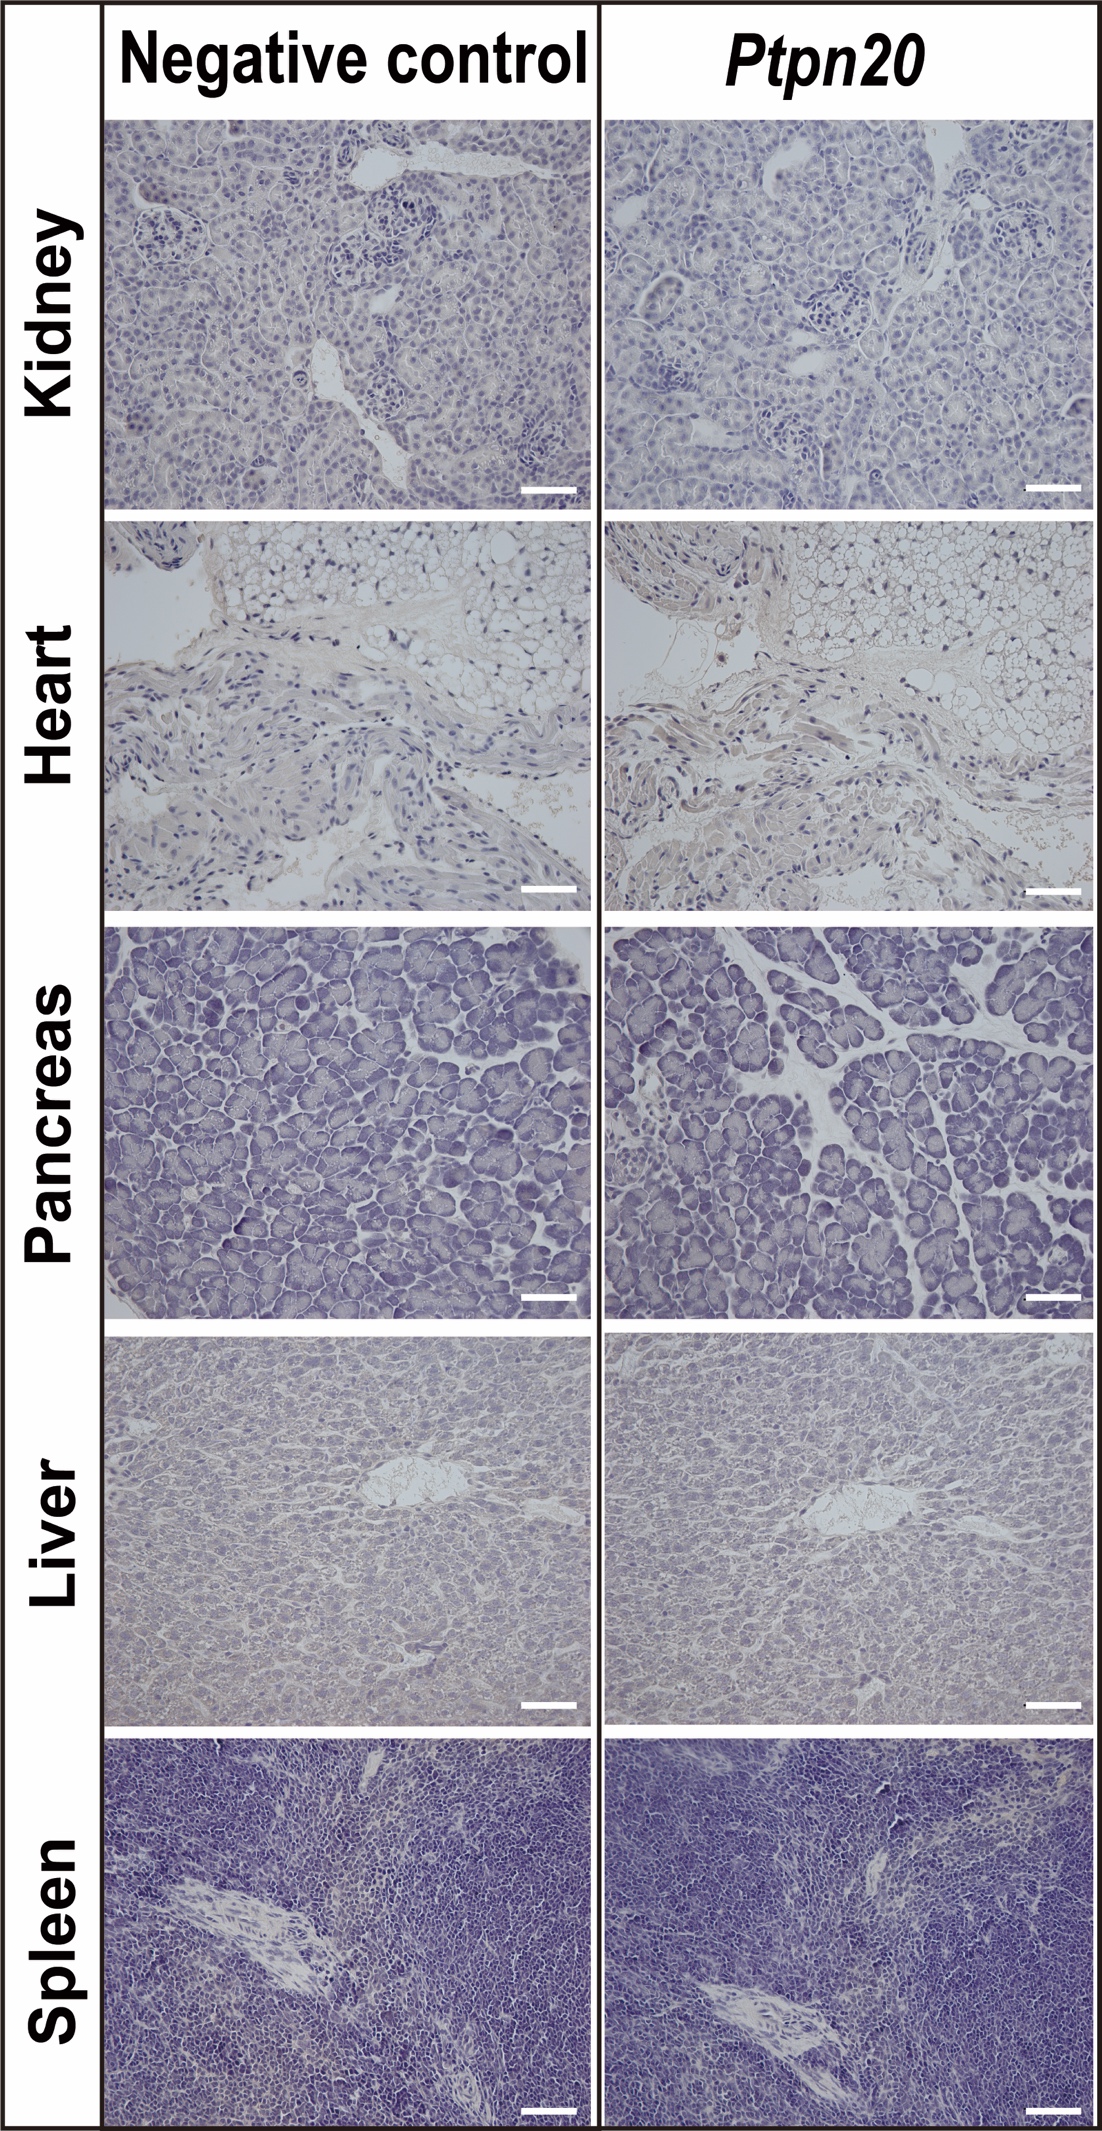 |
| --- |
| **Figure S2. *Ptpn20* expression in the tissues of mice.**  Representative photomicrographs of immunohistochemistry staining with anti-*Ptpn20* antibody in the heart, lung, spleen, pancreas, and liver from 4-week-old C57BL/6J mice. Scale bar = 50 µm. |
