# Supplementary material for: Ptpn20 Deletion in H-tx Rats Facilitates Cotransporter-mediated Water Transport in the Choroid Plexus: Evidence of Genetic Risk for Hydrocephalus in an Experimental Study
Source: Research Square preprint supplement (doi:10.21203/rs.3.rs-1305224/v1), 2022-02-02
Supplement: Supplementary file 5 [file b76ffe1f57474a702df97041.docx]

| 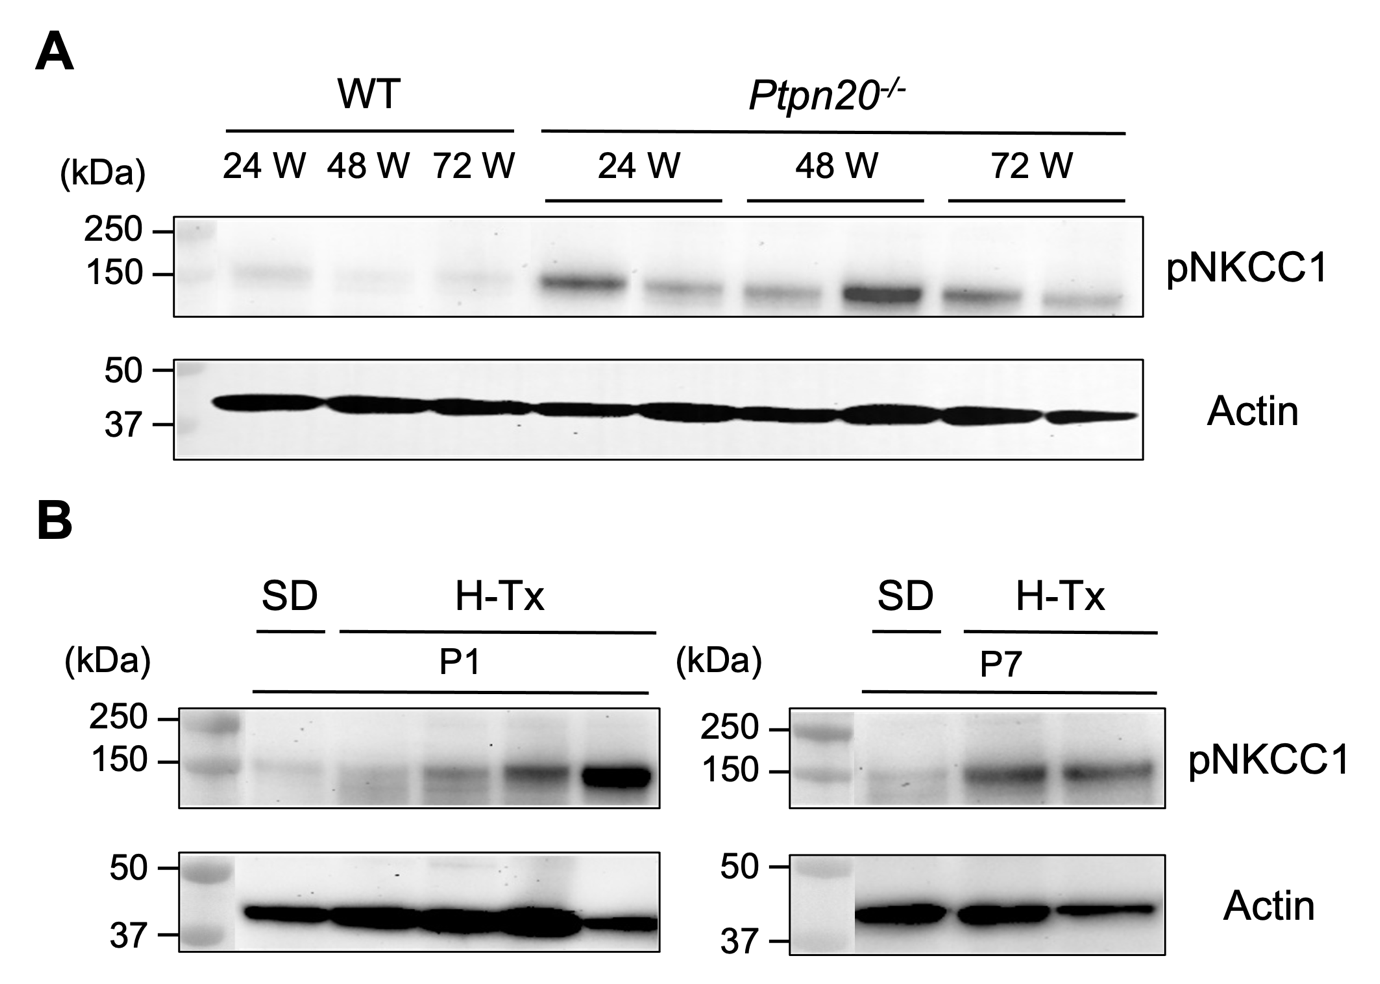 |
| --- |
| **Figure S3.** **Immunoblotting of pNKCC1 protein expression in aged *Ptpn20-/-* mice and H-Tx rats.**  A. Immunoblotting of pNKCC1 protein expression in the choroid plexus (CP) of wild-type (WT) and *Ptpn20-/-* mouse at 24, 48 and 72 weeks (W). The level of pNKCC1 remained elevated for a longer period in *Ptpn20-/-* mice than in WT.  B. Immunoblotting of pNKCC1 protein expression in the CP of SD and H-Tx rats at P1 and P7. Expression of pNKCC1 is higher in the CP of most H-Tx rats than in SD rats. Actin is used as the loading control. |
