# Supplementary material for: Ptpn20 Deletion in H-tx Rats Facilitates Cotransporter-mediated Water Transport in the Choroid Plexus: Evidence of Genetic Risk for Hydrocephalus in an Experimental Study
Source: Research Square preprint supplement (doi:10.21203/rs.3.rs-1305224/v1), 2022-02-02
Supplement: Supplementary file 7 [file d4b23d7f5ce20b36a12b925c.docx]

**Table S3. Primary antibodies for immunoblot investigations**

| **Animal** | **Protein** | **Target** | **Primary antibodies** |
| --- | --- | --- | --- |
| Rat | 10 µg | *Ptpn20* | Rabbit Ptpn20 antibody 48kDa (orb317724, Biorbyt, Cambridge, UK, 1:500) |
|  | Actin | Rabbit Anti-Actin 42kDa (A2066 SIGMA, Saint Louis, Missouri 63103 USA, 1:200) |
| Mouse | 10 µg | *Ptpn20* | Rabbit Ptpn20 antibody 48kDa (orb317724, Biorbyt, Cambridge, UK, 1:500) |
| 15 µg | pNKCC1 | Rabbit phospho-NKCC1 antibody (Thr212/Thr217) 131kDa (ABS1004 Sigma-Aldrich, Merck KGaA, Darmstadt, Germany, 1: 500) |
|  | Actin | Rabbit Anti-Actin 42kDa (A2066 SIGMA, Saint Louis, Missouri 63103 USA, 1:200) |
