# Supplementary material for: Ptpn20 Deletion in H-tx Rats Facilitates Cotransporter-mediated Water Transport in the Choroid Plexus: Evidence of Genetic Risk for Hydrocephalus in an Experimental Study
Source: Research Square preprint supplement (doi:10.21203/rs.3.rs-1305224/v1), 2022-02-02
Supplement: Supplementary file 8 [file 82b3315f817d6233296028a9.docx]

| 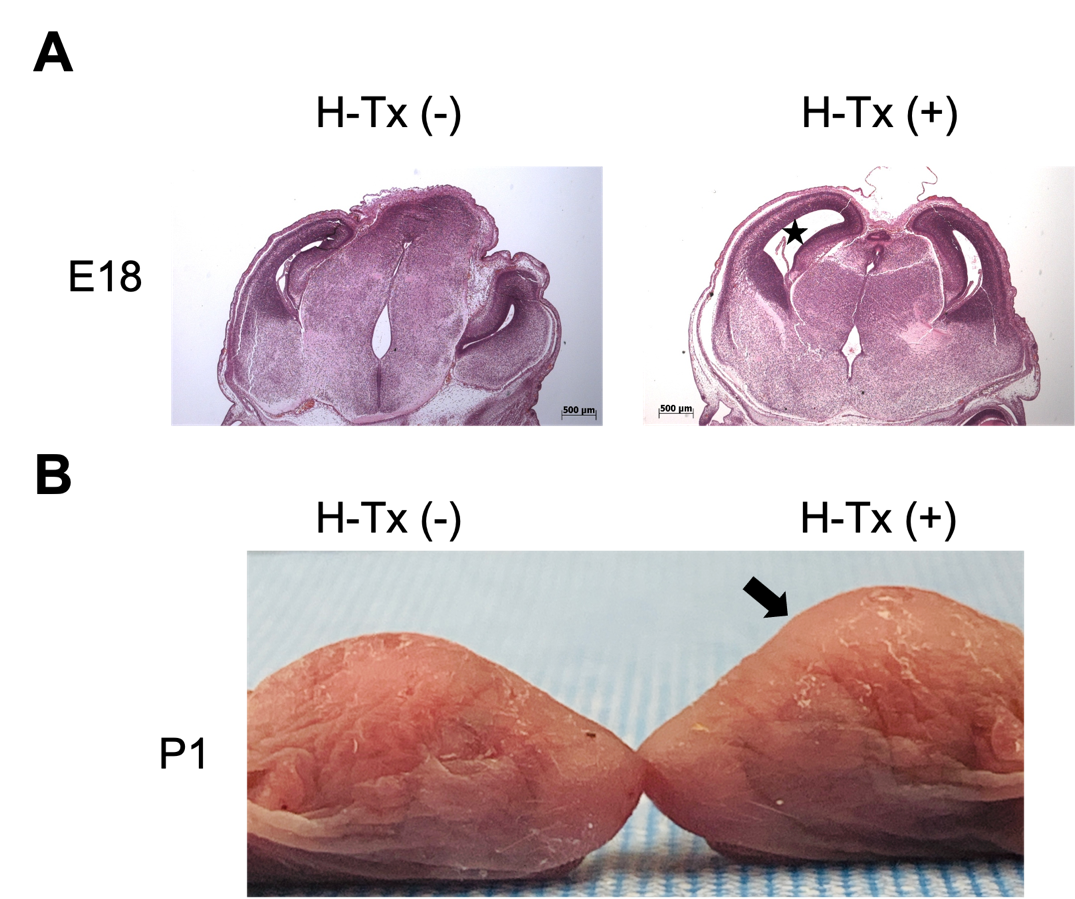 |
| --- |
| **Figure S1. H-Tx rats for genetic risk identification.**  A. HE-stained coronal sections of H-Tx (-) and H-Tx (+) rats at E18, asterisk shows the dilated lateral ventricle. Scale bar = 500 µm.  B. Images of P1 H-Tx (-) and H-Tx (+) rats, arrow points to the domed head. |
