# Supplementary material for: Ptpn20 Deletion in H-tx Rats Facilitates Cotransporter-mediated Water Transport in the Choroid Plexus: Evidence of Genetic Risk for Hydrocephalus in an Experimental Study
Source: Research Square preprint supplement (doi:10.21203/rs.3.rs-1305224/v1), 2022-02-02
Supplement: Supplementary file 9 [file ca6a5c7a9e96c6e325d83476.docx]

**Table S4. Reagents for immunofluorescence investigations**

| **Animal** | **Method** | **Target** | **Reagents** | |
| --- | --- | --- | --- | --- |
| **Primary antibody** | **Secondary antibody** |
| Rat | Paraffin | *Ptpn20* | Rabbit PTPN20B antibody (CSB-PA065165, CusAb, 1:250) | Alexa Fluor® 488 donkey anti-rabbit IgG (A21206, Molecular Probes®, Invitrogen, 1:250) |
| Mouse | Vibratome | pNKCC1 | Rabbit pNKCC1 antibody (CSB-PA065165, CusAb, 1:25) | Alpaca anti-Rabbit IgG AlexaFluor488 (SA510322: Thermo, 1:100) |
| NKCC1 | Goat NKCC1 antibody (C-14) sc-21547 (Santa Cruz Biotechnology, 1:25) | Donkey anti-Goat IgG (H+L) Alexa FluorTM Plus 594 (A32758, Invitrogen, 1:50) |
| AQP1 | Mouse AQP1 (B-11) sc-25287 (Santa Cruz Biotechnology, 1:25) | Donkey anti-Mouse IgG (H+L) Alexa FluorTM Plus 488 (A32766, Invitrogen, 1:25) |
| Na+/K+-ATPase | Goat Na+/K+-ATPase a1 (C-20) sc-16043 (Santa Cruz Biotechnology, 1:25) | Donkey anti-Goat IgG (H+L) Alexa FluorTM Plus 594 (A32758, Invitrogen, 1:50) |
| Cryosection | *Ptpn20* | Rabbit PTPN20B antibody (CSB-PA065165, CusAb, 1:250) | Alexa Fluor® 488 donkey anti-rabbit IgG (A21206, Molecular Probes®, Invitrogen,1:250) |
| F-Actin | Actin-stain 555 Fluorescent Phalloidin (Cat. # PHDH1, Cytoskeleton. Inc., 1:50) | |
